# Supplementary material for: Intranasal Bifidobacterium longum protects against viral-induced lung inflammation and injury in a murine model of lethal influenza infection
Source: PubMed Central journal article supplement — eBioMedicine. 2020 Sep 11;60:102981. doi: 10.1016/j.ebiom.2020.102981 (PMC7495089; doi:10.1016/j.ebiom.2020.102981), 2020-09-11
Supplement: mmc7.pdf [file mmc7.pdf]

| Cell population | Day    | Vehicle control Mean (95% CI)  | <i>B. longum</i> Cell wall Mean (95% CI) | Uninfected Vehicle Control Mean (95% CI) |
|-----------------|--------|--------------------------------|------------------------------------------|------------------------------------------|
| Neutrophils     | Day 0  | 9489 (338.9 to 18639)          |                                          |                                          |
|                 | Day 3  | 156608<br>(-102143 to 415359)  | 556000<br>(173296 to 938704)             |                                          |
|                 | Day 5  | 1113000<br>(552937 to 1673063) | 645800<br>(-126035 to 1417635)           | 8467<br>(4543--12391)                    |
|                 | Day 10 |                                | 110385<br>(-72349 to 293119)             |                                          |
| Macrophages     | Day 0  | 76256 (51078 to 101434)        |                                          |                                          |
|                 | Day 3  | 119400<br>(84312 to 154488)    | 197600<br>(93254 to 301946)              |                                          |
|                 | Day 5  | 404000<br>(210657 to 597343)   | 263800<br>(122064 to 405536)             | 92292<br>(69102-115481)                  |
|                 | Day 10 |                                | 408507<br>(247260 to 569753)             |                                          |
