# Supplementary figures and images for: Intranasal Bifidobacterium longum protects against viral-induced lung inflammation and injury in a murine model of lethal influenza infection
Source: PubMed Central journal article supplement — eBioMedicine. 2020 Sep 11;60:102981. doi: 10.1016/j.ebiom.2020.102981 (PMC7495089; doi:10.1016/j.ebiom.2020.102981), 2020-09-11

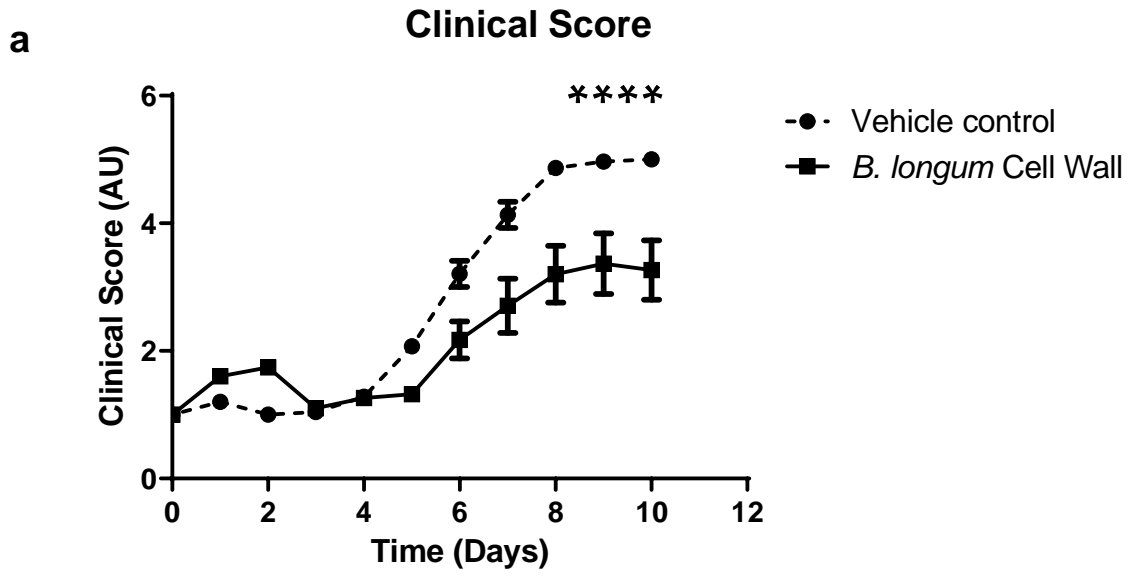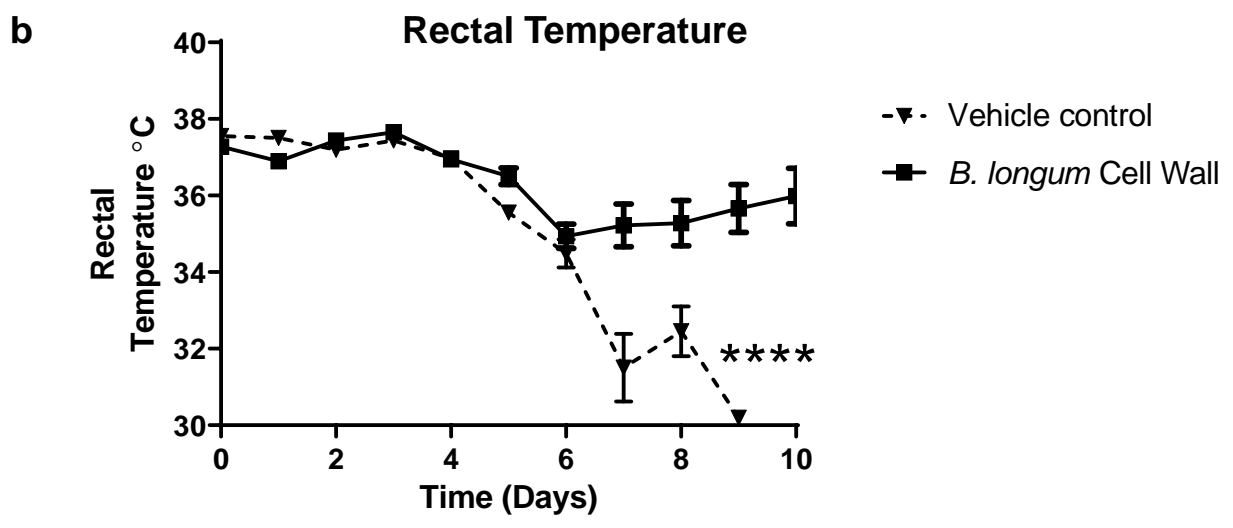

Supplement: mmc1.pdf [file mmc1.pdf]

# Lung viral load

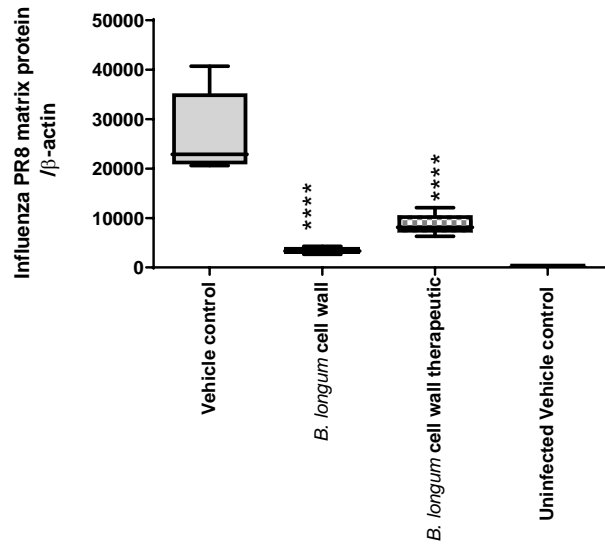

Supplement: mmc2.pdf [file mmc2.pdf]

**a**

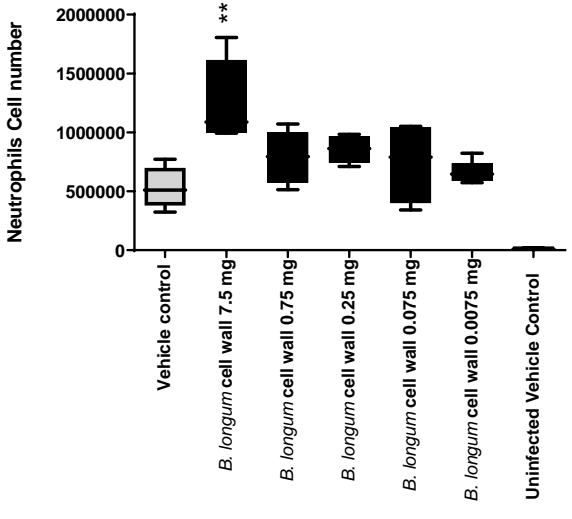

**b**

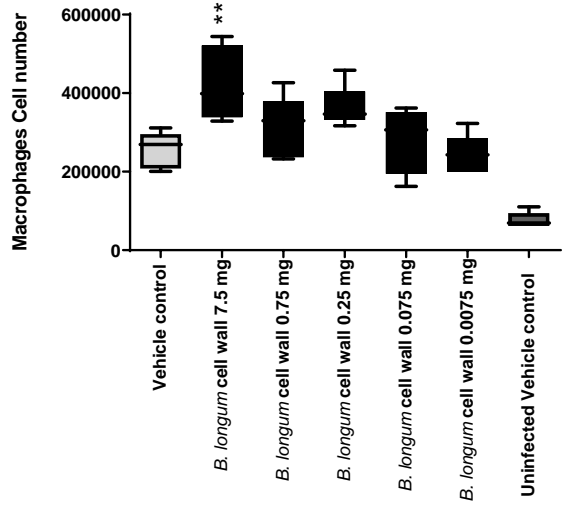

**c**

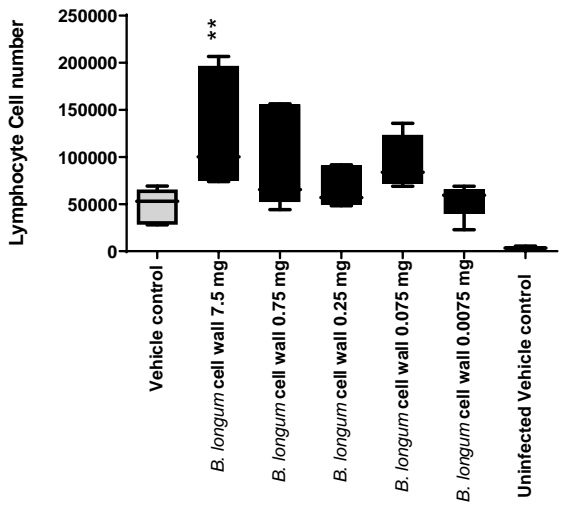

**d**

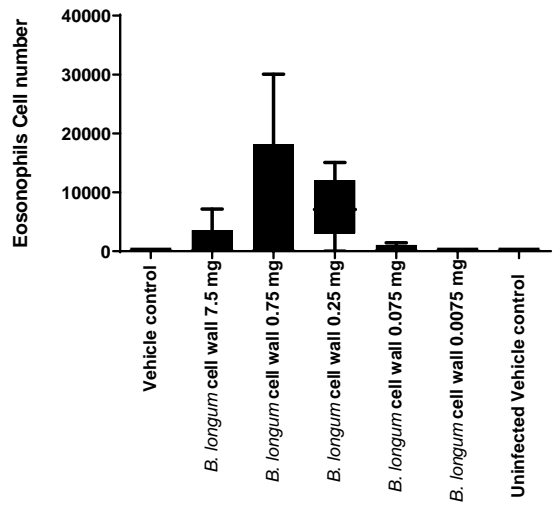

Supplement: mmc3.pdf [file mmc3.pdf]

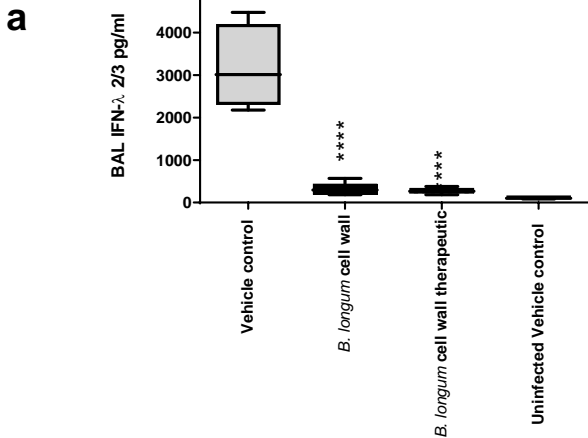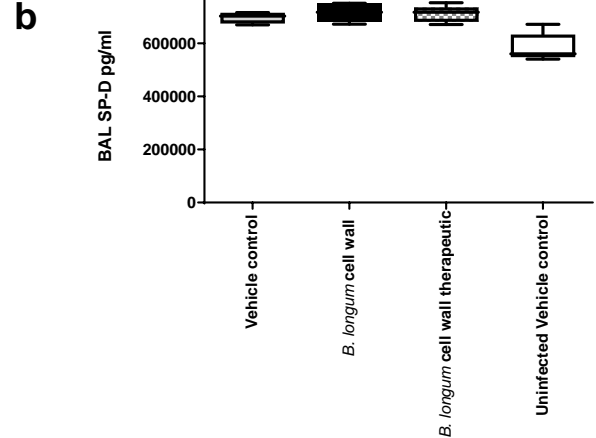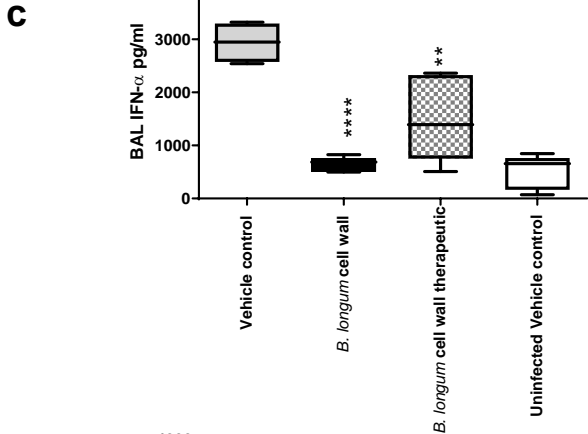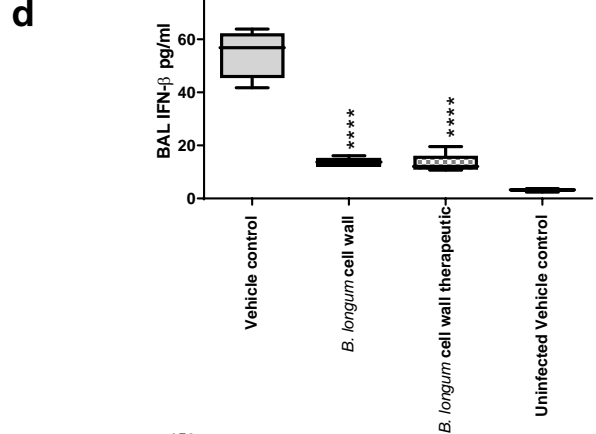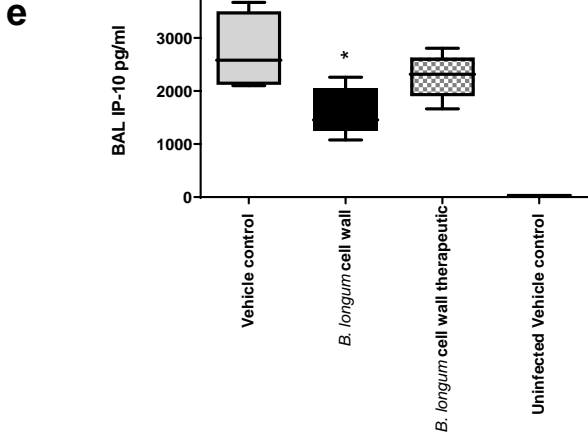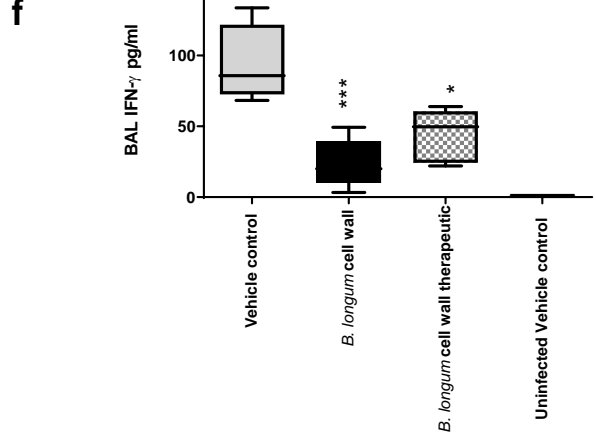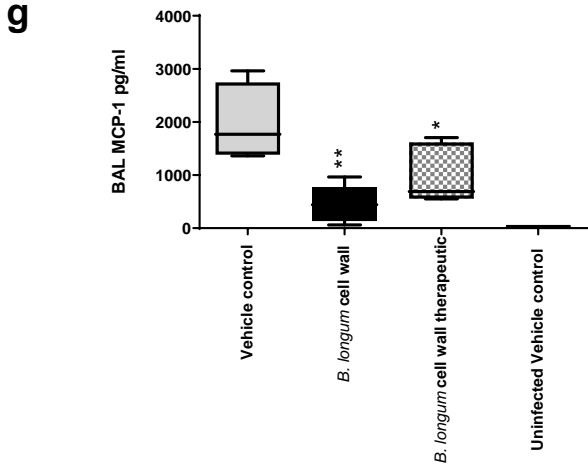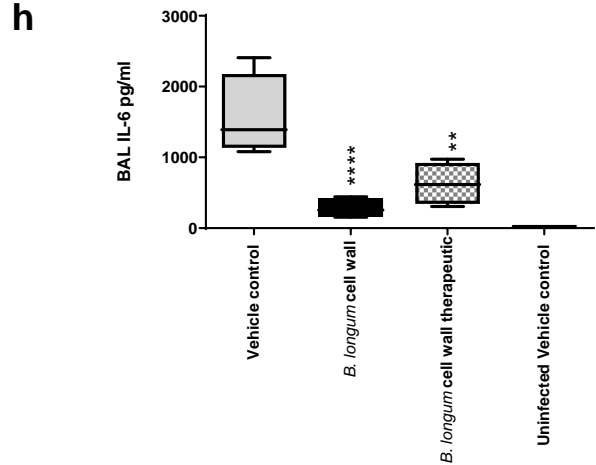

Supplement: mmc4.pdf [file mmc4.pdf]

**a**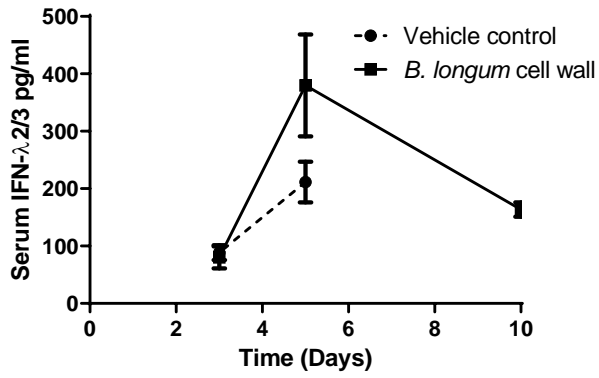**b**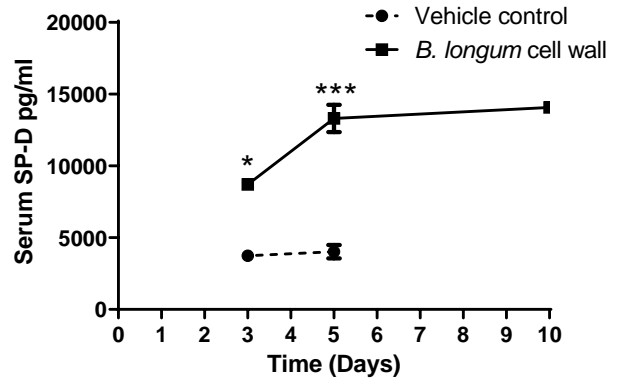**c**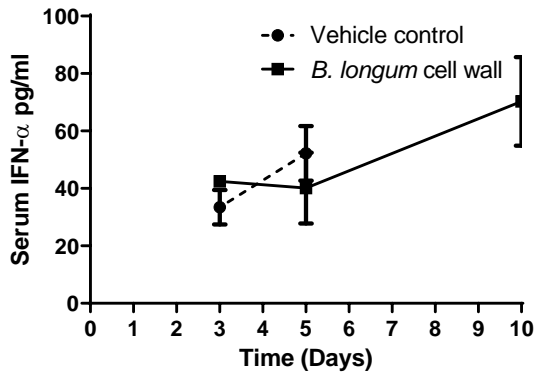**d**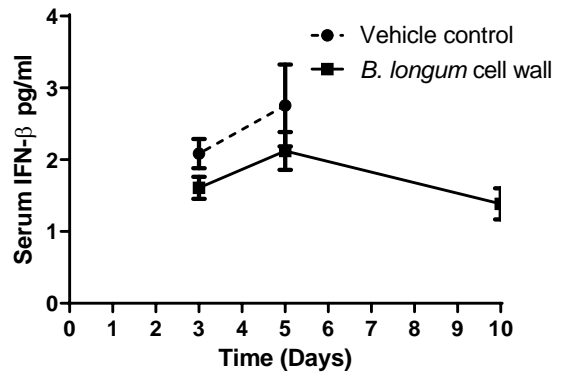**e**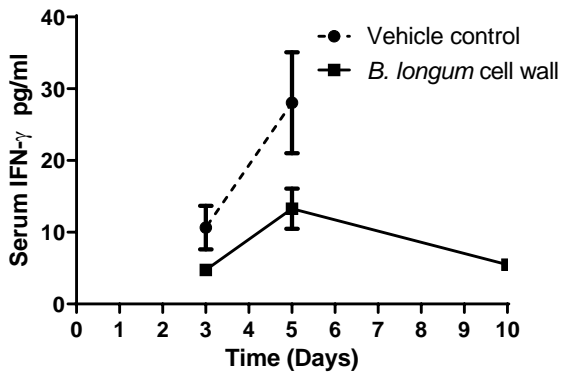**f**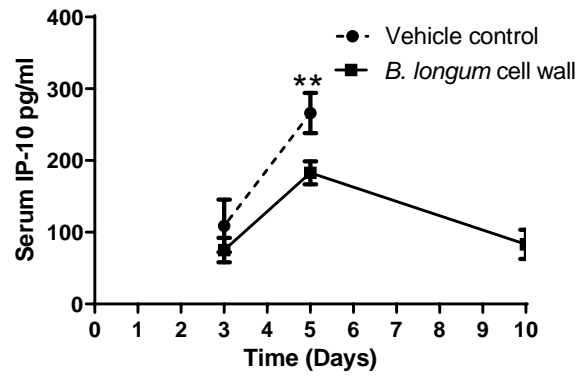**g**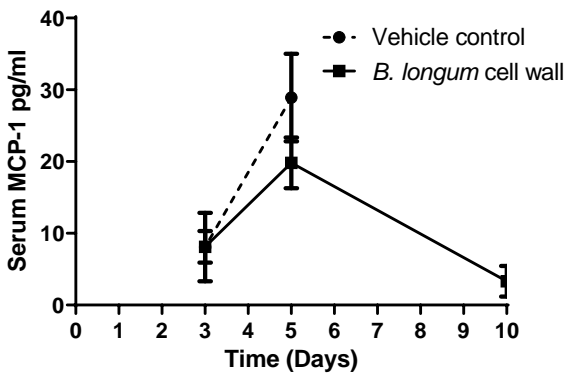**h**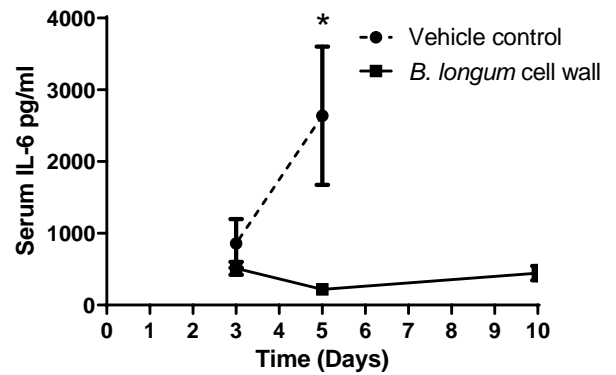

Supplement: mmc5.pdf [file mmc5.pdf]

a

### Dose-dependent response

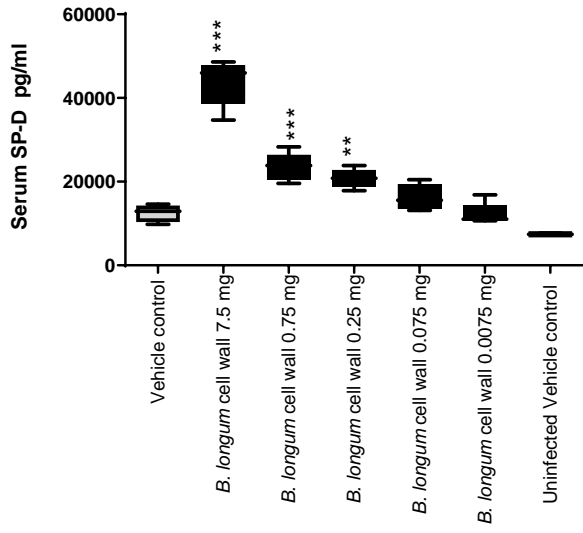

b

### Post-infection administration

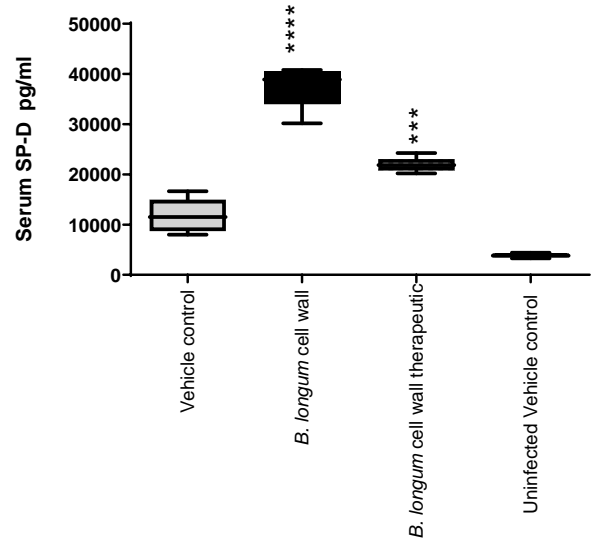

Supplement: mmc6.pdf [file mmc6.pdf]
